# Supplementary figures and images for: Phagocytes mediate targeting of iron oxide nanoparticles to tumors for cancer therapy
Source: Royal Society of Chemistry journal article supplement (doi:10.1039/c2ib20180a), 2012-08-10

# Supplemental Figure 1

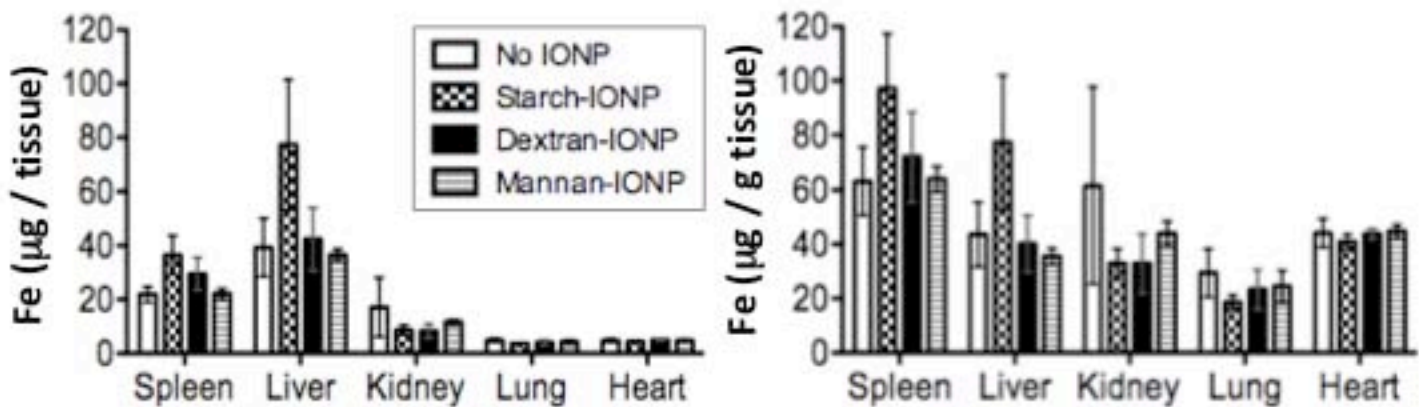

Supplement: c2ib20180a.pdf [file c2ib20180a.pdf]

# Supplemental Figure 2

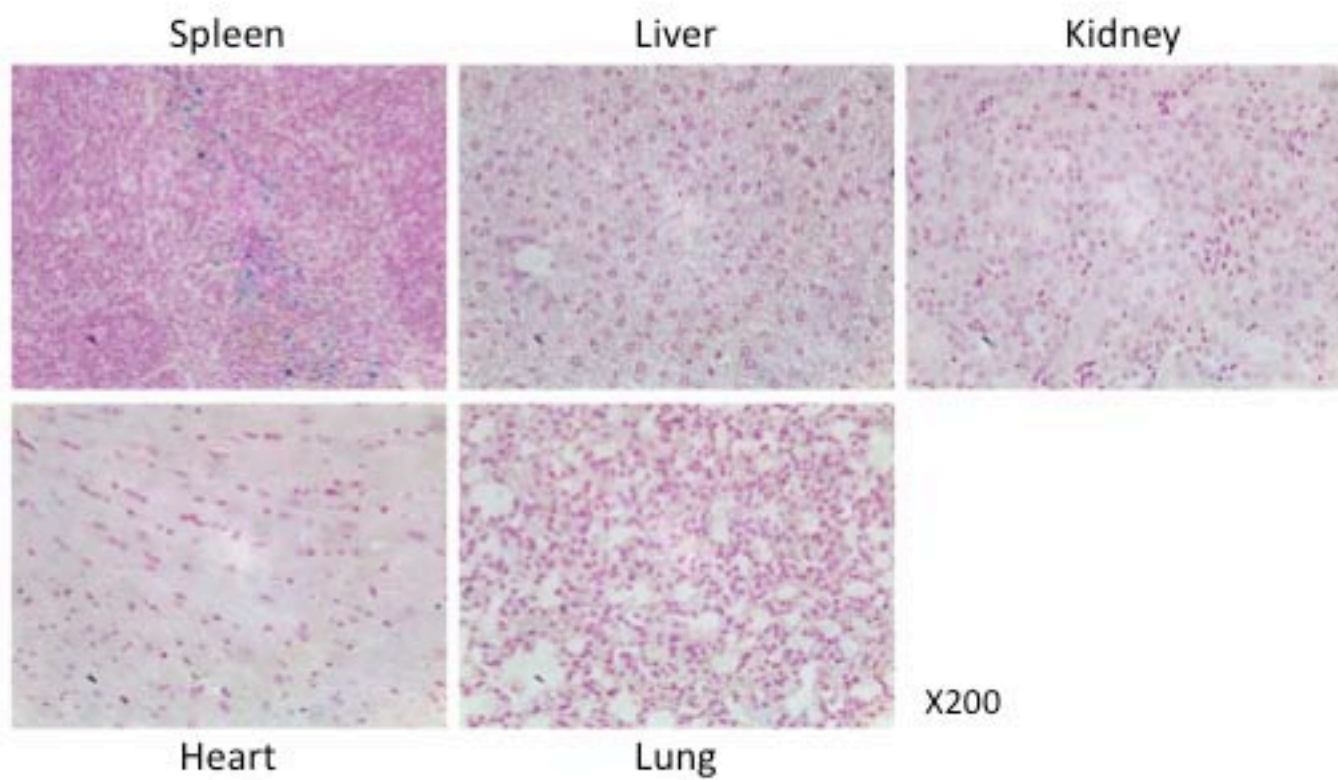

Supplement: c2ib20180a_2.pdf [file c2ib20180a_2.pdf]

# Supplemental Figure 3

## A

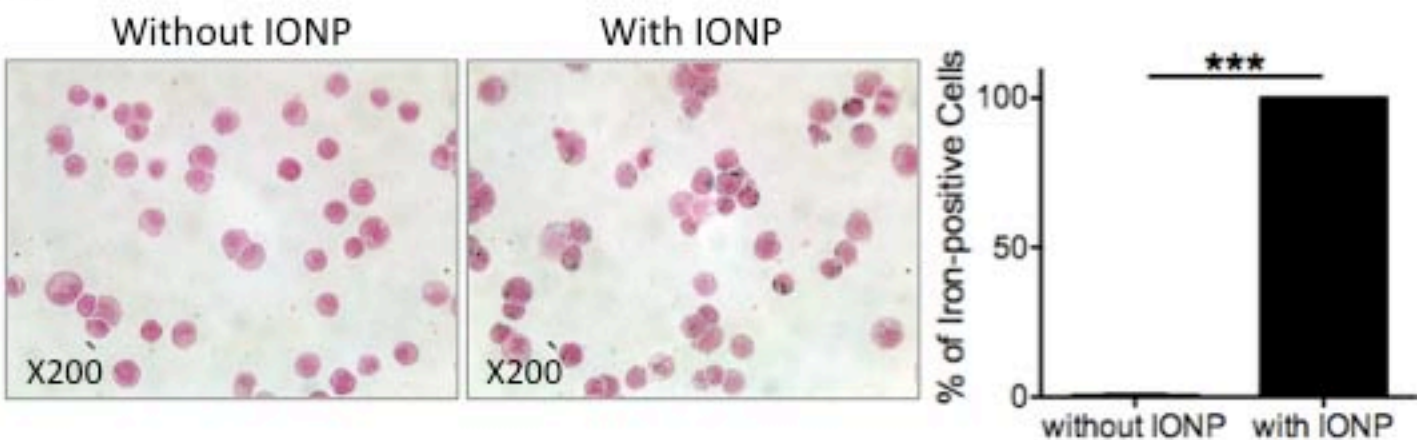

## B

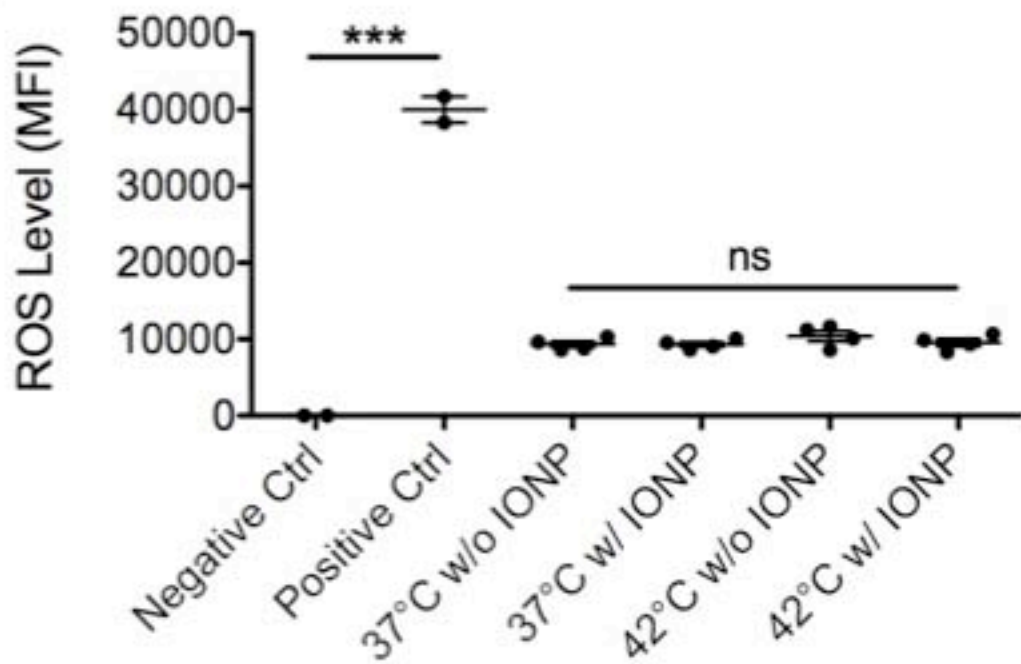

Supplement: c2ib20180a_3.pdf [file c2ib20180a_3.pdf]
